# Supplementary material for: Socioeconomic differences in school dropout among young adults: the role of social relations
Source: Springer Nature journal article supplement (doi:10.1186/s12889-015-2391-0), 2015-10-15
Supplement: MOESM1 [file 9750618]

# Additional file 1.

Odds ratios for poor relations with parents, friends, teachers and classmates at age 15 and 18 by household income (high vs. low) at age 15, altogether and by gender, n=3054

|                                                             | Household income |             |       |             |      |             |
|-------------------------------------------------------------|------------------|-------------|-------|-------------|------|-------------|
|                                                             | All              |             | Girls |             | Boys |             |
|                                                             | OR               | 95%-CI      | OR    | 95%-CI      | OR   | 95%-CI      |
| <b>Social relations (age 15)</b>                            |                  |             |       |             |      |             |
| <b>Family</b>                                               |                  |             |       |             |      |             |
| Poor family functioning                                     | 1.67             | 1.36 ; 2.04 | 1.45  | 1.09 ; 1.93 | 1.93 | 1.44 ; 2.59 |
| <b>Friends</b>                                              |                  |             |       |             |      |             |
| No friend to be confidential with                           | 1.21             | 0.91 ; 1.61 | 1.62  | 1.03 ; 2.55 | 1.01 | 0.70 ; 1.48 |
| Do not talk to friends about personal worries               | 1.20             | 0.99 ; 1.46 | 1.42  | 0.98 ; 2.06 | 1.25 | 0.96 ; 1.61 |
| Not satisfied with help and support from friends            | 1.61             | 1.15 ; 2.25 | 1.34  | 0.79 ; 2.28 | 1.87 | 1.21 ; 2.90 |
| <b>Teachers and classmates</b>                              |                  |             |       |             |      |             |
| Teachers do not help me with school work when I need it     | 1.29             | 1.01 ; 1.66 | 1.49  | 1.07 ; 2.09 | 1.07 | 0.74 ; 1.55 |
| Classmates are not doing well together                      | 1.87             | 1.21 ; 2.90 | 1.44  | 0.82 ; 2.55 | 2.68 | 1.32 ; 5.42 |
| Feel left out by the other pupils in the class              | 1.61             | 1.24 ; 2.10 | 1.53  | 1.09 ; 2.16 | 1.70 | 1.13 ; 2.56 |
| <b>Social relations (age 18)</b>                            |                  |             |       |             |      |             |
| <b>Family</b>                                               |                  |             |       |             |      |             |
| Difficult to handle conflicts                               | 1.44             | 1.15 ; 1.80 | 1.53  | 1.13 ; 2.05 | 1.34 | 0.95 ; 1.87 |
| <b>Friends</b>                                              |                  |             |       |             |      |             |
| No friend to be confidential with                           | 1.90             | 1.26 ; 2.87 | 3.12  | 1.70 ; 5.71 | 1.15 | 0.64 ; 2.10 |
| Difficult to handle conflicts with friends or partner       | 1.54             | 1.23 ; 1.92 | 1.70  | 1.26 ; 2.29 | 1.34 | 0.96 ; 1.88 |
| <b>Teachers and classmates</b>                              |                  |             |       |             |      |             |
| Do not feel attached to my classmates                       | 1.81             | 1.20 ; 2.74 | 2.58  | 1.47 ; 4.52 | 1.16 | 0.62 ; 2.19 |
| Teachers do not help me with schoolwork when I need it      | 1.33             | 0.84 ; 2.10 | 1.12  | 0.58 ; 2.20 | 1.57 | 0.83 ; 2.96 |
| Teachers do not help me with personal problems if I need it | 0.87             | 0.67 ; 1.11 | 0.90  | 0.65 ; 1.25 | 0.82 | 0.55 ; 1.21 |

Odds ratios for poor relations with parents, friends, teachers and classmates at age 15 and 18 by highest education in the household (high vs. low) at age 15, altogether and by gender, n=3054

|                                                             | Highest education in the household |             |       |             |      |             |
|-------------------------------------------------------------|------------------------------------|-------------|-------|-------------|------|-------------|
|                                                             | All                                |             | Girls |             | Boys |             |
|                                                             | OR                                 | 95%-CI      | OR    | 95%-CI      | OR   | 95%-CI      |
| <b>Social relations (age 15)</b>                            |                                    |             |       |             |      |             |
| <b>Family</b>                                               |                                    |             |       |             |      |             |
| Poor family functioning                                     | 1.72                               | 1.31 ; 2.24 | 1.98  | 1.36 ; 2.87 | 1.48 | 1.00 ; 2.18 |
| <b>Friends</b>                                              |                                    |             |       |             |      |             |
| No friend to be confidential with                           | 1.18                               | 0.80 ; 1.73 | 1.38  | 0.76 ; 2.49 | 1.10 | 0.66 ; 1.83 |
| Do not talk to friends about personal worries               | 1.44                               | 1.12 ; 1.86 | 1.92  | 1.22 ; 3.03 | 1.55 | 1.10 ; 2.19 |
| Not satisfied with help and support from friends            | 2.05                               | 1.38 ; 3.04 | 2.22  | 1.23 ; 4.02 | 1.98 | 1.17 ; 3.37 |
| <b>Teachers and classmates</b>                              |                                    |             |       |             |      |             |
| Teachers do not help me with school work when I need it     | 1.31                               | 0.96 ; 1.79 | 1.11  | 0.72 ; 1.70 | 1.55 | 0.98 ; 2.44 |
| Classmates are not doing well together                      | 1.54                               | 0.91 ; 2.61 | 1.66  | 0.84 ; 3.29 | 1.33 | 0.58 ; 3.05 |
| Feel left out by the other pupils in the class              | 1.58                               | 1.14 ; 2.18 | 1.58  | 1.04 ; 2.39 | 1.46 | 0.86 ; 2.48 |
| <b>Social relations (age 18)</b>                            |                                    |             |       |             |      |             |
| <b>Family</b>                                               |                                    |             |       |             |      |             |
| Difficult to handle conflicts                               | 1.47                               | 1.08 ; 2.01 | 1.56  | 1.03 ; 2.35 | 1.29 | 0.79 ; 2.11 |
| <b>Friends</b>                                              |                                    |             |       |             |      |             |
| No friend to be confidential with                           | 1.39                               | 0.77 ; 2.50 | 3.23  | 1.41 ; 7.41 | 0.67 | 0.25 ; 1.75 |
| Difficult to handle conflicts with friends or partner       | 1.25                               | 0.91 ; 1.71 | 1.37  | 0.91 ; 2.07 | 1.03 | 0.63 ; 1.70 |
| <b>Teachers and classmates</b>                              |                                    |             |       |             |      |             |
| Do not feel attached to my classmates                       | 1.04                               | 0.58 ; 1.86 | 1.35  | 0.67 ; 2.69 | 0.54 | 0.16 ; 1.83 |
| Teachers do not help me with schoolwork when I need it      | 2.29                               | 1.23 ; 4.24 | 3.96  | 1.80 ; 8.72 | 0.89 | 0.26 ; 3.07 |
| Teachers do not help me with personal problems if I need it | 0.67                               | 0.46 ; 0.98 | 0.59  | 0.36 ; 0.95 | 0.81 | 0.44 ; 1.47 |
